# Supplementary material for: Multiple mediation effect of coping styles and self-esteem in the relationship between spousal support and pregnancy stress of married immigrant pregnant women
Source: PeerJ journal article supplement (doi:10.7717/peerj.16295), 2023-10-24
Supplement: CODEBOOK.pdf [file CODEBOOK.pdf]

No. \_\_\_\_\_

**Consent Information**

How are you?

My name is Sohyun Moon, and I am majoring in nursing at Chosun University Medical School.

This study is conducted to identify the stress influencing factors of married migrant pregnant women and use them as basic data for the development of pregnancy stress intervention programs.

There is no possibility of physical or mental risk in this questionnaire, and the contents of the questionnaire that you disagree with or withdraw from the questionnaire and respond to will be confidential under an anonymous name, and the time required for the questionnaire is expected to be 20 to 30 minutes.

Data is prohibited from being read only by officials during the study period, and the authority to read is limited to this researcher, one advisor, and if necessary, the judge, and it is discarded after use. It will be a valuable material for this study, and I would appreciate it if you could honestly answer your usual thoughts so that it can be accurate.

Thank you for your cooperation in the research despite your busy schedule. We will give you a small prize as a thank you gift.

Date: July, \_\_\_\_\_ 2019

Researcher: Department of Nursing, Chosun University Medical School

H.P:010-8622-4509,

E-mail: shmoon@chosun.ac.kr

**Consent to participate**

- I understood the purpose of this study.
- I refuse to participate in the study at any time during the study period You can abort.
- I agree to participate in the data collection of this study according to my free will.

**Names of Participants:**

**(Signature)**

**Date:**

1. Please think of your usual thoughts and choose one of the most similar states and mark O.

| Self-esteem  |                                                      | not at all |   |   | always |
|--------------|------------------------------------------------------|------------|---|---|--------|
| selfesteem1  | I feel at much as valuable as other people           | 1          | 2 | 3 | 4      |
| se2          | I feel that I have some good characteristics         | 1          | 2 | 3 | 4      |
| se3          | I feel unsuccessful                                  | 4          | 3 | 2 | 1      |
| se4          | I feel that I can do things as other people do       | 1          | 2 | 3 | 4      |
| se5          | I feel that I do not have many things to be proud of | 4          | 3 | 2 | 1      |
| se6          | I have a positive attitude towards myself            | 1          | 2 | 3 | 4      |
| se7          | Generally, I am pleased with myself                  | 1          | 2 | 3 | 4      |
| se8          | I would like to have more selfrespect                | 1          | 2 | 3 | 4      |
| se9          | Sometimes I feel useless                             | 4          | 3 | 2 | 1      |
| se10         | Sometimes I think I am worthless                     | 4          | 3 | 2 | 1      |
| selfesteem11 | I feel that I need someone to control me             | 4          | 3 | 2 | 1      |

2. How good is your Korean?

Please mark O where applicable for each of the following questions.

|                 | Never | not good | moderate | Good | Very good |
|-----------------|-------|----------|----------|------|-----------|
| KoreanSpeaking  | 1     | 2        | 3        | 4    | 5         |
| KoreanListening | 1     | 2        | 3        | 4    | 5         |
| KoreanReading   | 1     | 2        | 3        | 4    | 5         |
| KoreanWriting   | 1     | 2        | 3        | 4    | 5         |

3. I want to know how you usually deal with stress.

Please indicate O where appropriate what method you used to deal with the most recent stress.

| Coping strategies      |                      | Item                                                                                                      | strongly disagree |   |   | strongly agree |
|------------------------|----------------------|-----------------------------------------------------------------------------------------------------------|-------------------|---|---|----------------|
| Problem based coping   | stresscopingproblem1 | Talked with spouse or other relative about the problem                                                    | 1                 | 2 | 3 | 4              |
|                        | stresscopingp2       | Talked with professional person (e.g., doctor)                                                            | 1                 | 2 | 3 | 4              |
|                        | stresscopingp3       | Tried to find out more about the situation                                                                | 1                 | 2 | 3 | 4              |
|                        | stresscopingp4       | Considered several alternatives for handling the problem                                                  | 1                 | 2 | 3 | 4              |
|                        | stresscopingp5       | Took some positive action                                                                                 | 1                 | 2 | 3 | 4              |
|                        | stresscopingp6       | Talked with close friends about the worries.                                                              | 1                 | 2 | 3 | 4              |
|                        | stresscopingp7       | Think only about the current state and don't worry about what will happen in the future                   | 1                 | 2 | 3 | 4              |
|                        | stresscopingp8       | Drew on my past experiences; I was in a similar situation before                                          | 1                 | 2 | 3 | 4              |
| Emotional based coping | stresscopinge9       | Prayed for a Safe birth                                                                                   | 1                 | 2 | 3 | 4              |
|                        | stresscopinge10      | Tried to see positive side                                                                                | 1                 | 2 | 3 | 4              |
|                        | stresscopinge11      | Tried to step back from the situation and be more objective                                               | 1                 | 2 | 3 | 4              |
|                        | stresscopinge12      | Kept my feelings to myself and tried to solve it.                                                         | 1                 | 2 | 3 | 4              |
|                        | stresscopinge13      | Didn't worry about it; figured everything would probably work out fine                                    | 1                 | 2 | 3 | 4              |
|                        | stresscopinge14      | Sometimes took it out on other people when I felt angry or depressed                                      | 1                 | 2 | 3 | 4              |
|                        | stresscopinge15      | Tried to reduce the tension by doing what you love, such as cross-stitch, reading, or listening to music. | 1                 | 2 | 3 | 4              |
|                        | stresscopinge16      | Prepared for the worst                                                                                    | 1                 | 2 | 3 | 4              |
|                        | stresscopinge17      | I try to forget the problem.                                                                              | 1                 | 2 | 3 | 4              |
|                        | stresscopinge18      | Tried to reduce the tension by eating more                                                                | 1                 | 2 | 3 | 4              |

4. It's about how much help you get from your husband during this pregnancy. Please circle (O) the number that matches your opinion.

| social support_spouse support | Item                                                           | Very dissatisfied |   |   |   |   | Very satisfied |
|-------------------------------|----------------------------------------------------------------|-------------------|---|---|---|---|----------------|
| socialsupportp1               | He shares similar experiences with me                          | 1                 | 2 | 3 | 4 | 5 | 6              |
| socialsupportp2               | He helps me keep my morale high                                | 1                 | 2 | 3 | 4 | 5 | 6              |
| socialsupportp3               | He helps me when I need or when I am in trouble                | 1                 | 2 | 3 | 4 | 5 | 6              |
| socialsupportp4               | He is interested in my daily routine and problems              | 1                 | 2 | 3 | 4 | 5 | 6              |
| socialsupportp5               | He tries to focus on me when he does something for me          | 1                 | 2 | 3 | 4 | 5 | 6              |
| socialsupportp6               | He spares time to talk to me about personal and private issue  | 1                 | 2 | 3 | 4 | 5 | 6              |
| socialsupportp7               | He appreciates the things I do for him                         | 1                 | 2 | 3 | 4 | 5 | 6              |
| socialsupportp8               | He tolerates my ups and downs and unusual behaviors            | 1                 | 2 | 3 | 4 | 5 | 6              |
| socialsupportp9               | He takes me serious when I am concerned about something        | 1                 | 2 | 3 | 4 | 5 | 6              |
| socialsupportp10              | He clarifies my condition so that I can understand more easily | 1                 | 2 | 3 | 4 | 5 | 6              |
| socialsupportp11              | I know he will be with me when I need help                     | 1                 | 2 | 3 | 4 | 5 | 6              |

5. To what extent are the following currently a stress or hassle for you?

| pregnancy stress  |                                                                                          | not stressful at all |   |   | very stressful |
|-------------------|------------------------------------------------------------------------------------------|----------------------|---|---|----------------|
| pregnancystress1  | Financial worries                                                                        | 1                    | 2 | 3 | 4              |
| pregnancystress2  | Family problems (e.g.children, etc)                                                      |                      |   |   |                |
| pregnancystress3  | Parents-in-law or relatives problems                                                     |                      |   |   |                |
| pregnancystress4  | Sexual life problems                                                                     |                      |   |   |                |
| pregnancystress5  | marital relationship problems                                                            |                      |   |   |                |
| pregnancystress6  | Housing or Surrounding environment(including moving) problems                            |                      |   |   |                |
| pregnancystress7  | Being exposed to violence (emotional)                                                    |                      |   |   |                |
| pregnancystress8  | Being exposed to violence (physical)                                                     |                      |   |   |                |
| pregnancystress9  | Having lost someone you love recently (e.g., death, divorce, being away from each other) |                      |   |   |                |
| pregnancystress10 | Problems about consuming alcohol or cigarets and coffee                                  |                      |   |   |                |
| pregnancystress11 | Problems about work life(housework or job)                                               |                      |   |   |                |

♣ General characteristics

This is to learn about your general characteristics. Please mark where appropriate.

1. **[mother age\_mothage]**Your age: ( ) years old

**[partnet age\_partage]**Husband's age: ( ) years old

2. **[nation]**What is your nationality before entering the country?

1. Mongolia / 2. Vietnam / 3. Japan / 4. China / 5. Cambodia / 6. Philippines

3. **[redidura]**How long have you lived in Korea?

- ① Less than 6 months
- ② 6 months or more to less than 1 year
- ③ More than 1 to less than 3 years
- ④ 3 years or more to less than 5 years
- ⑤ 5 years or more to less than 6 years
- ⑥ more than six years

4. **[edu]**What is your level of education?

- ① No academic background
- ② elementary school graduate
- ③ a junior high school graduate
- ④ a high school graduate
- ⑤ College graduates or higher

5. **[withpartner]**Do you currently live with your spouse?

- ① Yes
- ② No

6. **[job]**Do you have a job?

- ① Yes
- ② No

7. **[partjob]**What is your spouse's job?

- ① a production position
- ② a skilled commercial engineer
- ③ General clerical work (office, civil service, teacher)
- ④ self-employed business
- ⑤ agricultural and livestock industries
- ⑥ Other

8. **[income]**What is your average monthly income?

- ① less than one million won

② 1 million won or more and less than 1.5 million won

③ 1.5 million won ~ less than 2 million won

④ Over 2 million won

⑤ I don't know

9. **[partconv]**How much do you talk to your spouse on average per day?

- ① We don't talk at all.
- ② Less than 30 minutes
- ③ 30 minutes to less than an hour
- ④ Less than 1-2 hours
- ⑤ More than 2 hours

♣ obstetric characteristics

Please indicate or respond where appropriate

1. **[GA]**Pregnancy week? ( ) week

2. **[pregnancynumber]**How many pregnancies are you currently pregnant with? ( )

3. **[pregnancyhope]**What do you want to get pregnant?

- ① desired pregnancy
- ② an unwanted pregnancy

4. **[pregnancycompli]**Are there any pregnancy-related complications (pregnant hypertension, gestational diabetes) currently in pregnancy?

- ① Yes
- ② No

5. **[presentbabynumber]**How many children do you have now?

- ① 1
- ② 2
- ③ 3
- ④ 4 or more people

Thank you for your efforts.
